# Supplementary material
Source: Springer Nature journal article supplement (https://www.springermedizin.de/resource/supplementary/12958_2005_253_MOESM4_ESM.pdf/9567468)

***Bax* mRNA / *18S* rRNA**

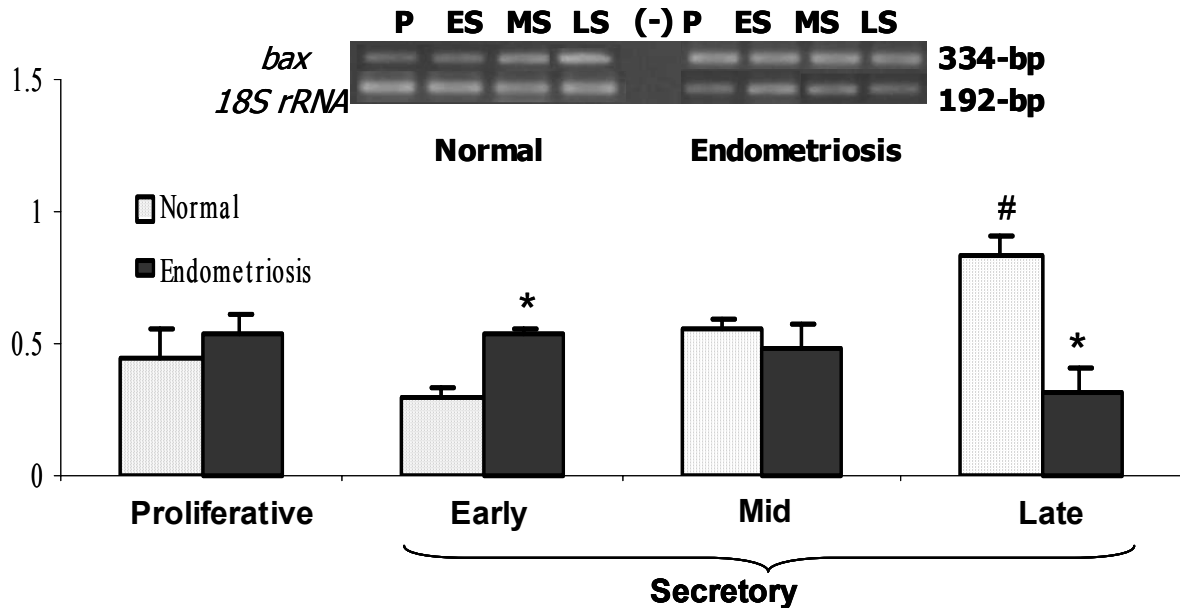

Supplement: MOESM4 [file 9567468]
